# Supplementary material for: On the performance of tests for the detection of signatures of selection: a case study with the Spanish autochthonous beef cattle populations
Source: PubMed Central journal article supplement (PMC5084421; doi:10.1186/s12711-016-0258-1), 2016-10-28

**ASTURIANA DE LOS VALLES**

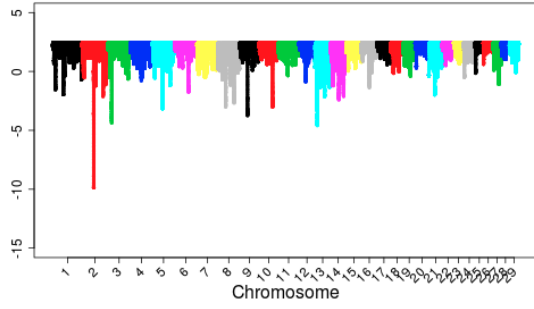

**AVILEÑA NEGRA IBERICA**

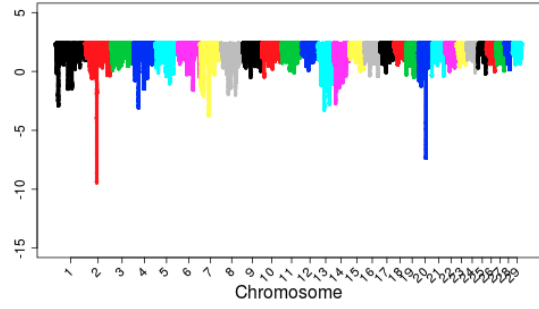

**BRUNA DELS PIRINEUS**

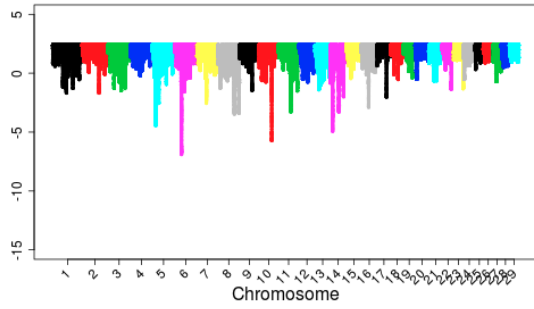

**MORUCHA**

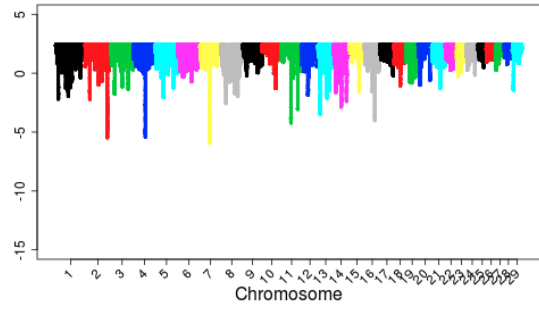

**PIRENAICA**

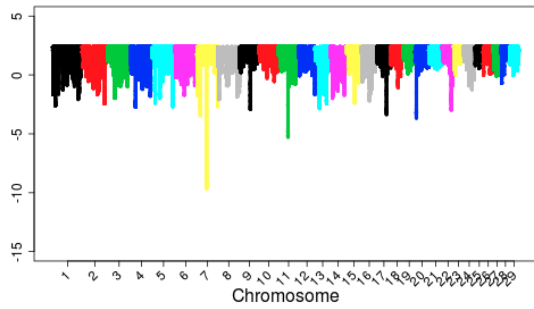

**RETINTA**

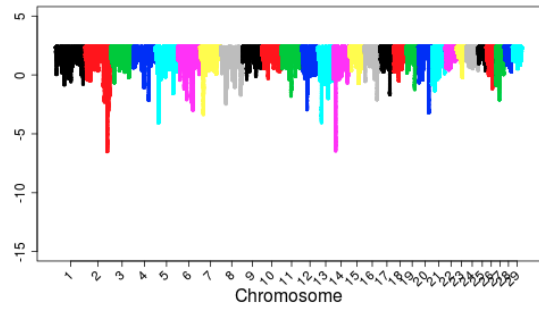

**RUBIA GALLEGA**

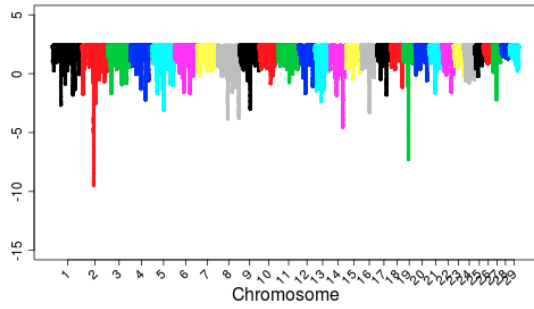

Supplement: 12711_2016_258_MOESM2_ESM.pdf [file 12711_2016_258_MOESM2_ESM.pdf]
