# Supplementary material for: On the performance of tests for the detection of signatures of selection: a case study with the Spanish autochthonous beef cattle populations
Source: PubMed Central journal article supplement (PMC5084421; doi:10.1186/s12711-016-0258-1), 2016-10-28

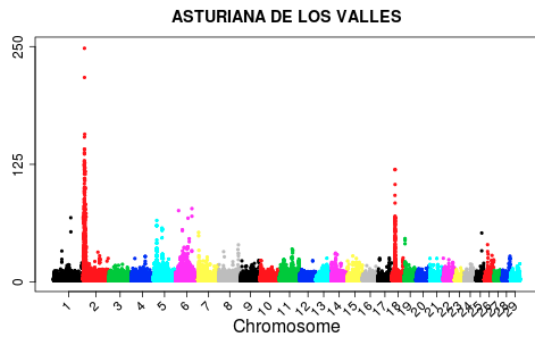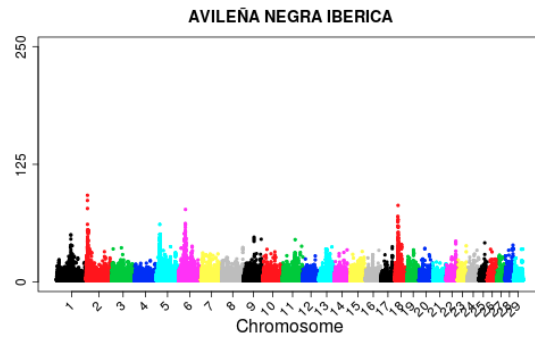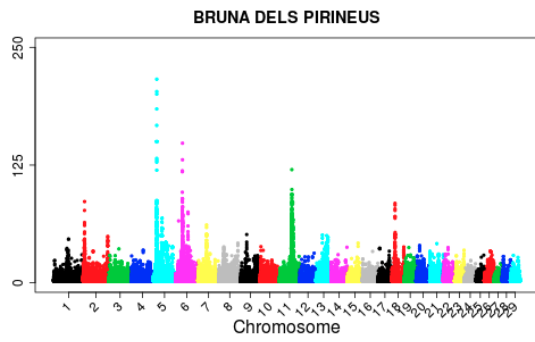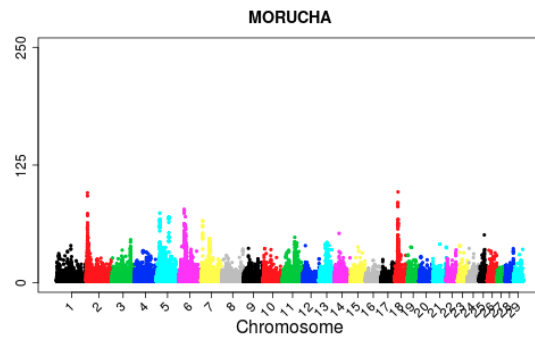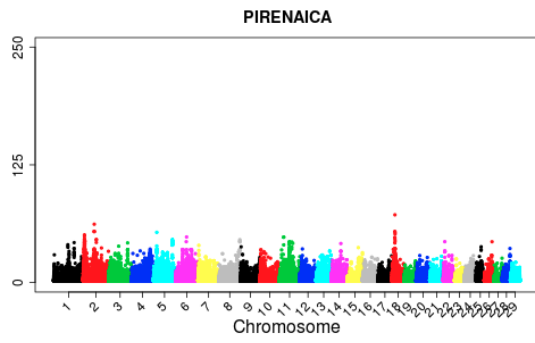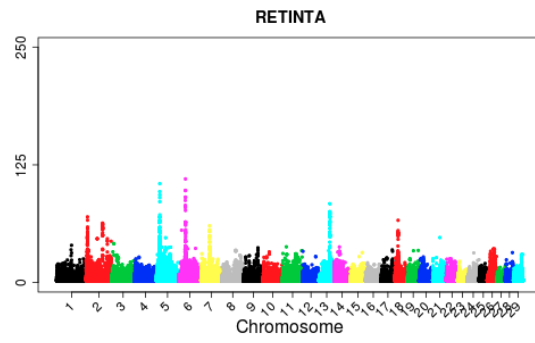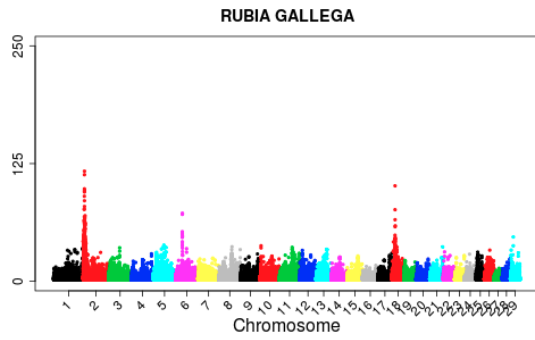

Supplement: 12711_2016_258_MOESM4_ESM.pdf [file 12711_2016_258_MOESM4_ESM.pdf]
